# Supplementary material for: Construction of a Core Collection of Notopterygii Rhizoma et Radix Based on Molecular Phylogeography
Source: Research Square preprint supplement (doi:10.21203/rs.3.rs-7238023/v1), 2025-09-15
Supplement: Supplementary file 1 [file 3c12d241b1a2f5750edbdb2c.docx]

**Table S1. Material Source Information of *Notopterygii* species**

| Species | Location of population | No. | Sources | Latitude | Longitude | Altitude | Sample |
| --- | --- | --- | --- | --- | --- | --- | --- |
| *Notopterygium incisum* | Ledu County, Qinghai Province | LD | Wild | 36.702867 | 102.392333 | 2935 | 20 |
| Huzhu County, Qinghai Province | HZ | Wild | 36.926900 | 102.375083 | 2735 | 20 |
| Mengyuan County, Qinghai Province | MY | Wild | 37.372533 | 102.013650 | 3216 | 20 |
| Banma County, Qinghai Province | BM | Wild | 32.739567 | 100.767617 | 3600 | 20 |
| Jiuzhi County, Qinghai Province | JZ | Wild | 33.367817 | 101.318667 | 4013 | 20 |
| Dari County, Qinghai Province | DR | Wild | 33.755817 | 99.561783 | 4012 | 20 |
| Yushu County, Qinghai Province | YS | Wild | 33.048033 | 96.854300 | 4002 | 20 |
| Chenduo County, Qinghai Province | CD | Wild | 33.133650 | 97.465733 | 4401 | 20 |
| Nangqian County, Qinghai Province | NQ | Wild | 32.258617 | 96.917867 | 3668 | 20 |
| Minle County, Gansu Province | ML | Wild | 38.091333 | 100.928033 | 2935 | 20 |
| Shandan County, Gansu Province | SD | Wild | 34.622850 | 101.440217 | 2735 | 20 |
| Yuzhong County, Gansu Province e | YZH | Wild | 35.730317 | 104.030283 | 3216 | 20 |
| Hezuo County, Gansu Province | HZU | Wild | 35.225200 | 103.075967 | 3337 | 20 |
| Zhuoni County, Gansu Province e | ZN | Wild | 34.598500 | 103.084200 | 3635 | 20 |
| Lintan County, Gansu Province | LT | Wild | 34.904850 | 103.690050 | 3525 | 20 |
| Maqu County, Gansu Province | MQ | Wild | 34.100517 | 101.888817 | 4012 | 20 |
| Luqu County, Gansu Province | LQ | Wild | 34.543617 | 102.530417 | 3600 | 20 |
| Ruoergai County, Sichuan Province | REG | Wild | 33.310650 | 103.227317 | 4013 | 20 |
| Hongyuan County, Sichuan Province | HOY | Wild | 32.431250 | 102.626967 | 4012 | 20 |
| Aba County, Sichuan Province | AB | Wild | 32.922433 | 101.569833 | 4002 | 20 |
| Maerkang County, Sichuan Province | MEK | Wild | 31.785167 | 102.217983 | 4401 | 20 |
| Jinchuan County, Sichuan Province | JC | Wild | 31.464817 | 101.799550 | 3668 | 20 |
| Daofu County, Sichuan Province | DF | Wild | 31.008250 | 101.007333 | 2935 | 20 |
| Ganzi County, Sichuan Province | GZ | Wild | 31.519500 | 99.976317 | 2735 | 20 |
| Luhuo County, Sichuan Province | LH | Wild | 31.600500 | 100.707900 | 3216 | 20 |
| Danba County, Sichuan Province | DB | Wild | 30.637283 | 101.635133 | 3337 | 20 |
| Xiaojin County, Sichuan Province | XJ | Wild | 31.523317 | 102.376200 | 3635 | 20 |
| *N. franchetii* | Zeku County, Qinghai Province | ZK | Wild | 101.911100 | 38.884217 | 3698 | 10 |
| Minhe County, Qinghai Province | MH | Wild | 102.747122 | 35.996873 | 3105 | 10 |
| Ledu County, Qinghai Province | LD | Wild | 102.730849 | 36.568840 | 2662 | 10 |
| Pingan County, Qinghai Province | PA | Wild | 101.914560 | 36.337192 | 2737 | 10 |
| Datong County, Qinghai Province | DT | Wild | 101.567096 | 37.159740 | 2687 | 10 |
| Huzhu County, Qinghai Province | HZ | Wild | 102.563925 | 36.858977 | 2291 | 10 |
| Huangzhong County, Qinghai Province | HZH | Wild | 101.688645 | 36.289774 | 2754 | 10 |
| Hezuo City, Gansu Province | HZU | Wild | 102.910529 | 34.940314 | 3045 | 10 |
| Min County, Gansu Province | MX | Wild | 104.259919 | 34.442572 | 2588 | 10 |
| Lintan County, Gansu Province | LT | Wild | 103.661320 | 34.821985 | 2464 | 10 |
| Zhuoni County, Gansu Province | ZN | Wild | 103.453528 | 34.847285 | 2829 | 10 |
| Luqu County, Gansu Province | LQ | Wild | 102.586927 | 34.557432 | 3103 | 10 |
| Ledu County, Qinghai Province | LDR | Cultivated | 102.306126 | 36.308930 | 2745 | 10 |
| Huzhu County, Qinghai Province | HZ1R | Cultivated | 102.556123 | 36.851971 | 2289 | 10 |
| Huzhu County, Qinghai Province | HZ2R | Cultivated | 102.556178 | 36.851999 | 2178 | 10 |
| Huzhu County, Qinghai Province | HZ3R | Cultivated | 102.556223 | 36.851956 | 2259 | 10 |
| Datong County, Qinghai Province | DTR | Cultivated | 101.753551 | 37.100862 | 2824 | 10 |
| Min County, Gansu Province | MXR | Cultivated | 104.248329 | 34.449200 | 2540 | 10 |
| Weiyuan County, Gansu Province | WYR | Cultivated | 103.996844 | 35.030666 | 2446 | 10 |
