# Supplementary material for: Construction of a Core Collection of Notopterygii Rhizoma et Radix Based on Molecular Phylogeography
Source: Research Square preprint supplement (doi:10.21203/rs.3.rs-7238023/v1), 2025-09-15
Supplement: Supplementary file 2 [file de77356bc1a6e60807995046.docx]

Table S2 Primer sequence for PCR amplification

| Primer | Sequences 5′-3′ | Annealing  temperature |
| --- | --- | --- |
| *trnS-trnG* | 5'-GCCGCT TTAGTCCACTCAGC-3'  5'-GAACGAATCACACTTTTACCAC-3' | 52 |
| *rbcL* | 5'-ATGTCACCACAAACAGAAAC-3'  5'-TCGCATGTACCTGCAGTAGC-3' | 53 |
| *matk* | 5'-CGTACAGTACTTTTGTGTTTACGAG-3'  5'-ACCCAGTCCATCTGGAAATCTTGGTTC-3' | 53 |
